# Supplementary material for: Role of no table salt on hypertension and stroke based on large sample size from National Health and Nutrition Examination Survey database
Source: Springer Nature journal article supplement (doi:10.1186/s12889-022-13722-8), 2022-07-05

The process of data analysis in this study

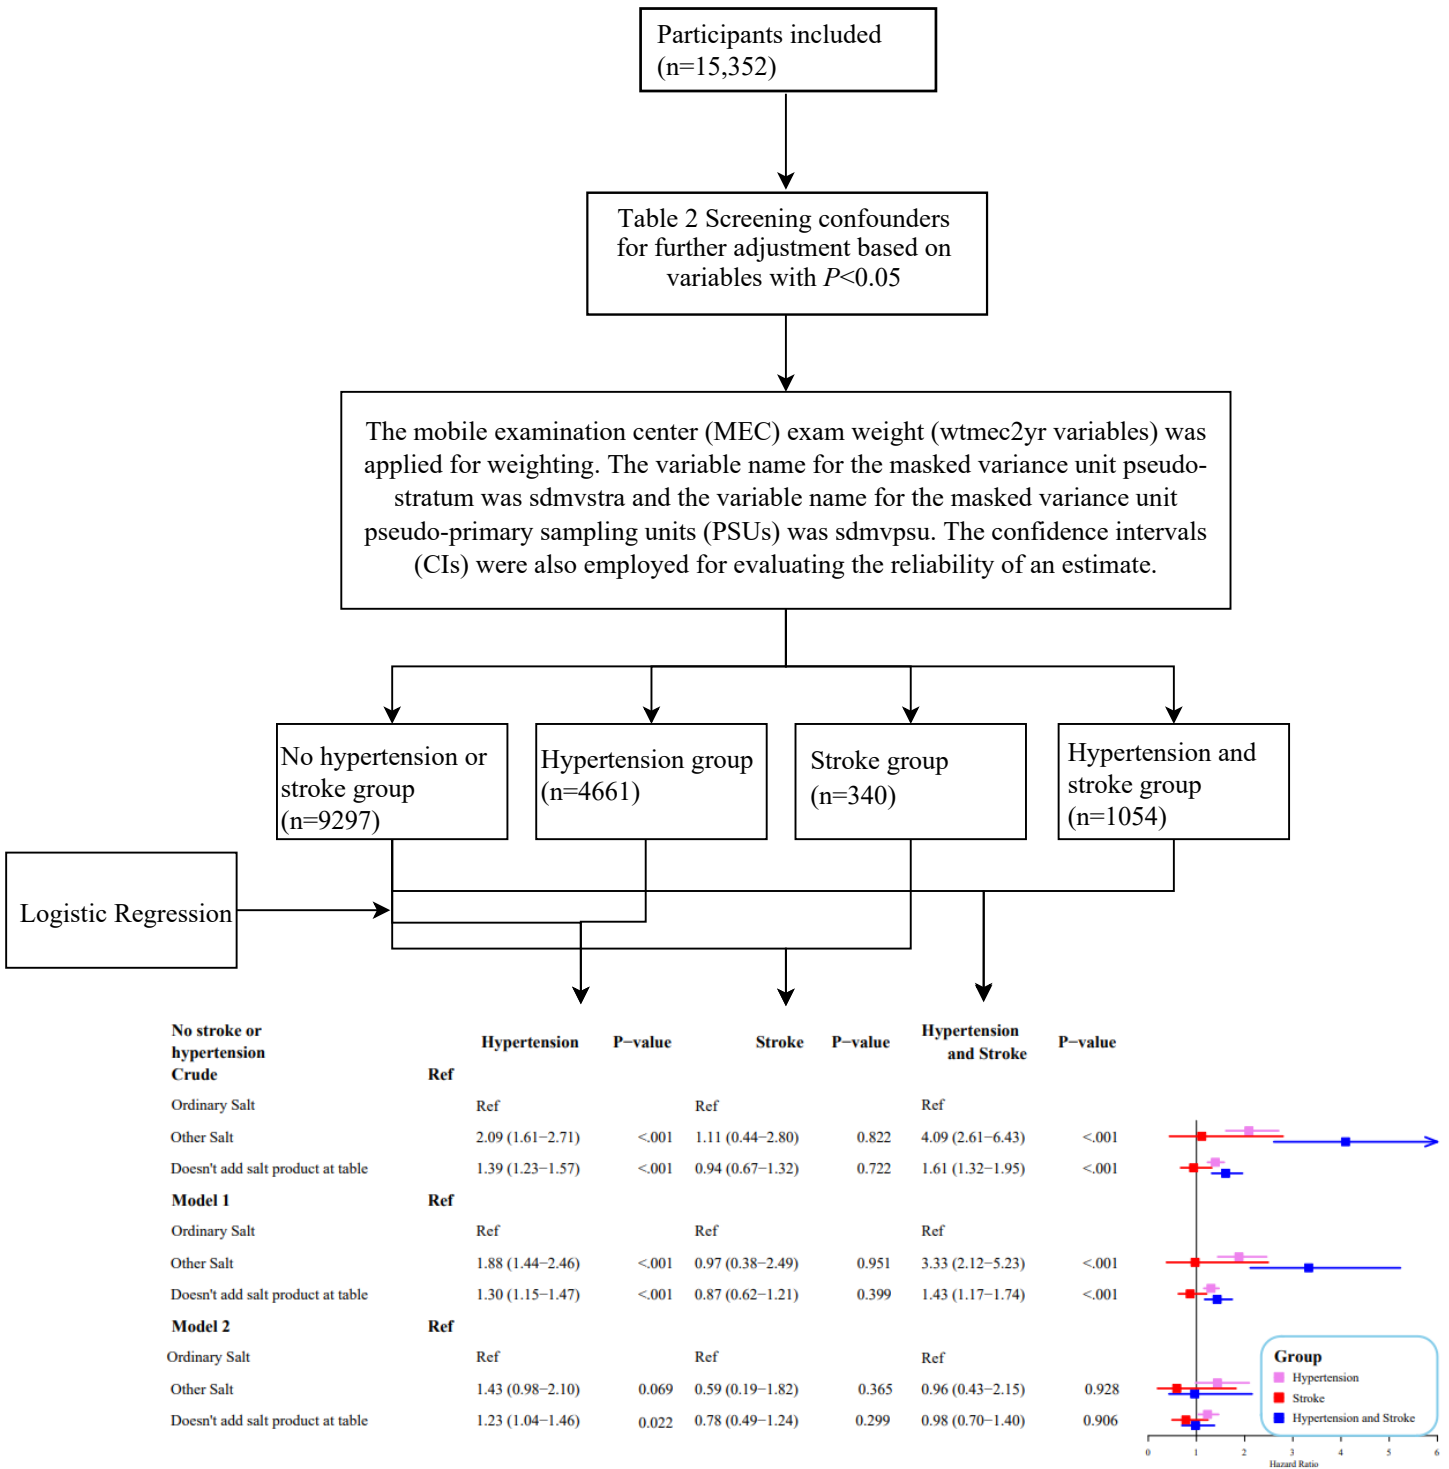

Supplement: MOESM1 [file 23240274]
